# Supplementary figures and images for: Cdc42p and Fus2p act together late in yeast cell fusion
Source: PubMed Central journal article supplement — Mol Biol Cell. 2012 Apr 1;23(7):1208–18. doi: 10.1091/mbc.E11-08-0723 (PMC3315798; doi:10.1091/mbc.e11-08-0723), 2012-04-01

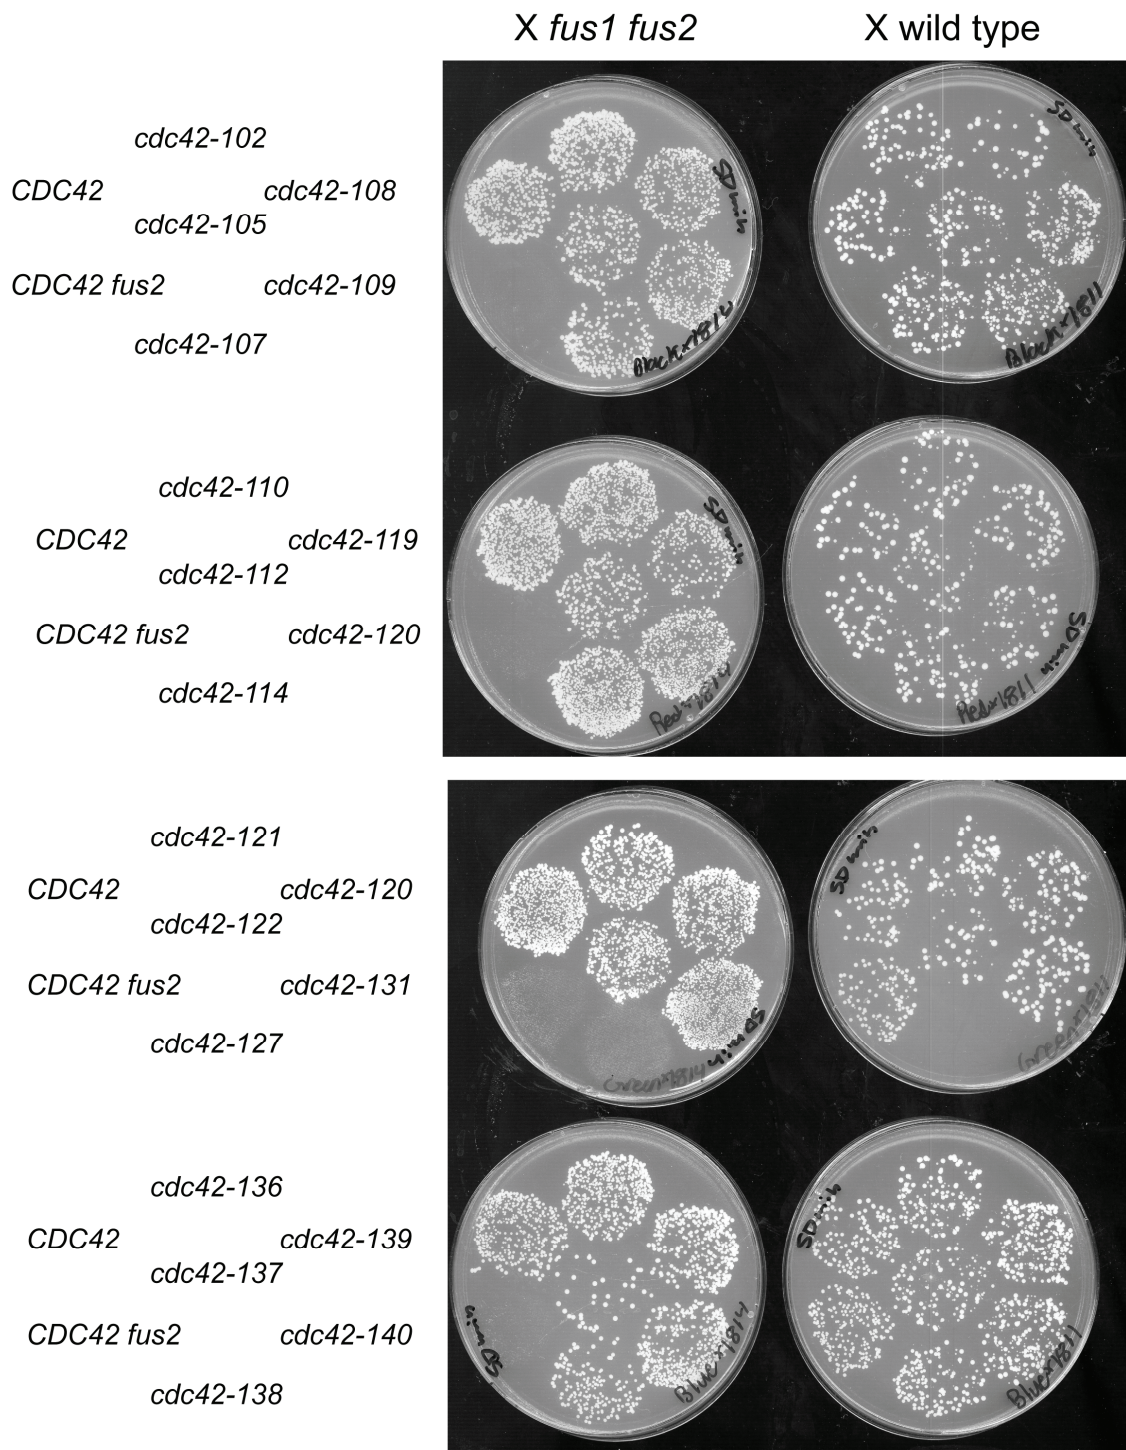

Supplementary Figure 1  
 Screen of Cdc42 alanine-scanning alleles with cell fusion defects

Supplement: supp_E11-08-0723_CombinedSupMats.pdf [file supp_E11-08-0723_CombinedSupMats.pdf]
